# Supplementary material for: Catalyst-like modulation of transition states for CFTR channel opening and closing: New stimulation strategy exploits nonequilibrium gating
Source: PubMed Central journal article supplement — J Gen Physiol. 2014 Feb;143(2):269–87. doi: 10.1085/jgp.201311089 (PMC4001772; doi:10.1085/jgp.201311089), 2014-02
Supplement: supp_jgp.201311089_JGP_201311089_sm.pdf [file supp_jgp.201311089_JGP_201311089_sm.pdf]

Csanády and Töröcsik, <http://www.jgp.org/cgi/content/full/jgp.201311089/DC1>

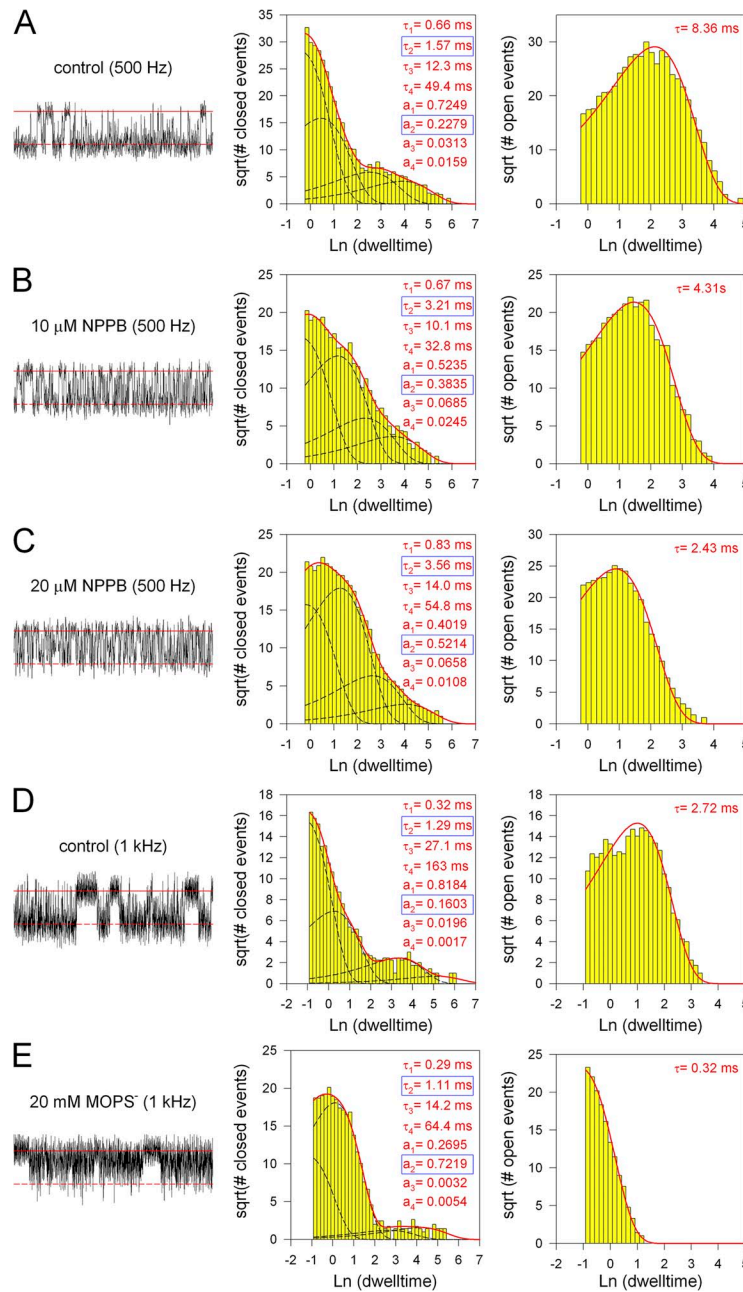

**Figure S1.** Mean blocked dwell time at  $-120$  mV is  $\sim 3$  ms for NPPB and  $\sim 1$  ms for MOPS<sup>-</sup>. (A–E; left) 1-s segments of recording of single locked-open E1371S CFTR channels at  $-120$  mV at bandwidths of 500 Hz (A–C) and 1 kHz (D and E). Red solid and dashed lines indicate closed and fully open ( $-1$  pA) current levels. (Right) Closed and open dwell-time histograms, obtained after idealization by half-amplitude threshold crossing, displayed using logarithmic binning and square root-transformed ordinates (Sigworth and Sine, 1987. *Biophys. J.* 52:1047–1054). Maximum likelihood fitting by sums of exponentials (red solid lines) combined with the log-likelihood ratio test (Csanády, 2006. *Biophys. J.* 90:3523–3545) identified one component for open times, but four components for closed times (black dashed lines; compare to Bompadre et al., 2005. *J. Gen. Physiol.* 125:377–394); time constants and fractional amplitudes are indicated. The small shoulder on the open-time histogram in D reflects contamination by spurious threshold crossing events caused by noise. Compared with the control (A) dwell-time distributions, the application of NPPB at (B) 10 and (C) 20  $\mu$ M caused the appearance of an  $\sim 3$ -ms closed-time component with dose-dependent fractional amplitude (blue boxes), while decreasing mean open time. Similarly, compared with the control (D) dwell-time distributions, the application of 20 mM MOPS<sup>-</sup> increased the fractional amplitude of an  $\sim 1$ -ms closed-time component (blue boxes), while decreasing mean open time.

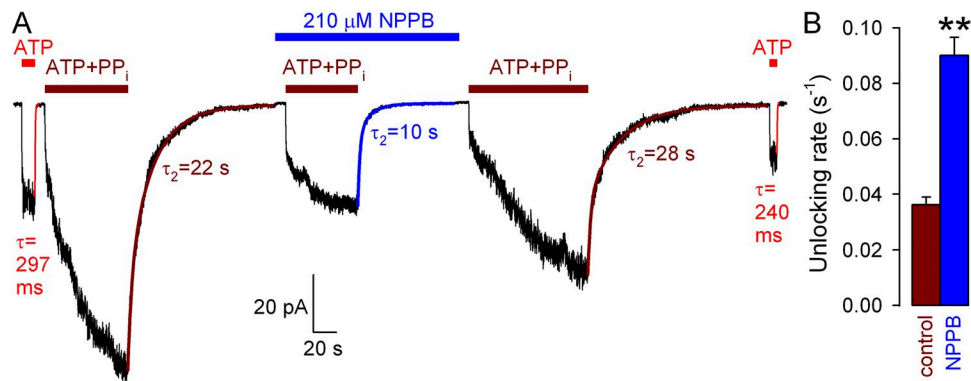

**Figure S2.** NPPB accelerates nonhydrolytic closure of WT CFTR locked open by ATP plus pyrophosphate. (A) Macroscopic WT CFTR current at  $-40$  mV elicited by exposures to either 2 mM ATP (red bars), or to 0.1 mM ATP plus 2 mM pyrophosphate (brown bars) in the absence or presence of 210  $\mu$ M NPPB (blue bar). Red lines, single-exponential fits ( $\tau$ , time constants representing mean burst duration under hydrolytic conditions); brown and blue lines, double exponential fits ( $\tau_2$ , slow time constants, representing mean locked-open duration). (B) Macroscopic unlocking rates (bars,  $1/\tau_2$ ) in the absence (brown) and presence of NPPB (blue).
